# Supplementary material for: Evaluation of Endoglin (CD105) expression in pediatric rhabdomyosarcoma
Source: PubMed Central journal article supplement (PMC5755407; doi:10.1186/s12885-017-3947-4), 2018-01-05
Supplement: 12885_2017_3947_MOESM1_ESM.pdf [file 12885_2017_3947_MOESM1_ESM.pdf]

**Patient#11 (ERMS)**

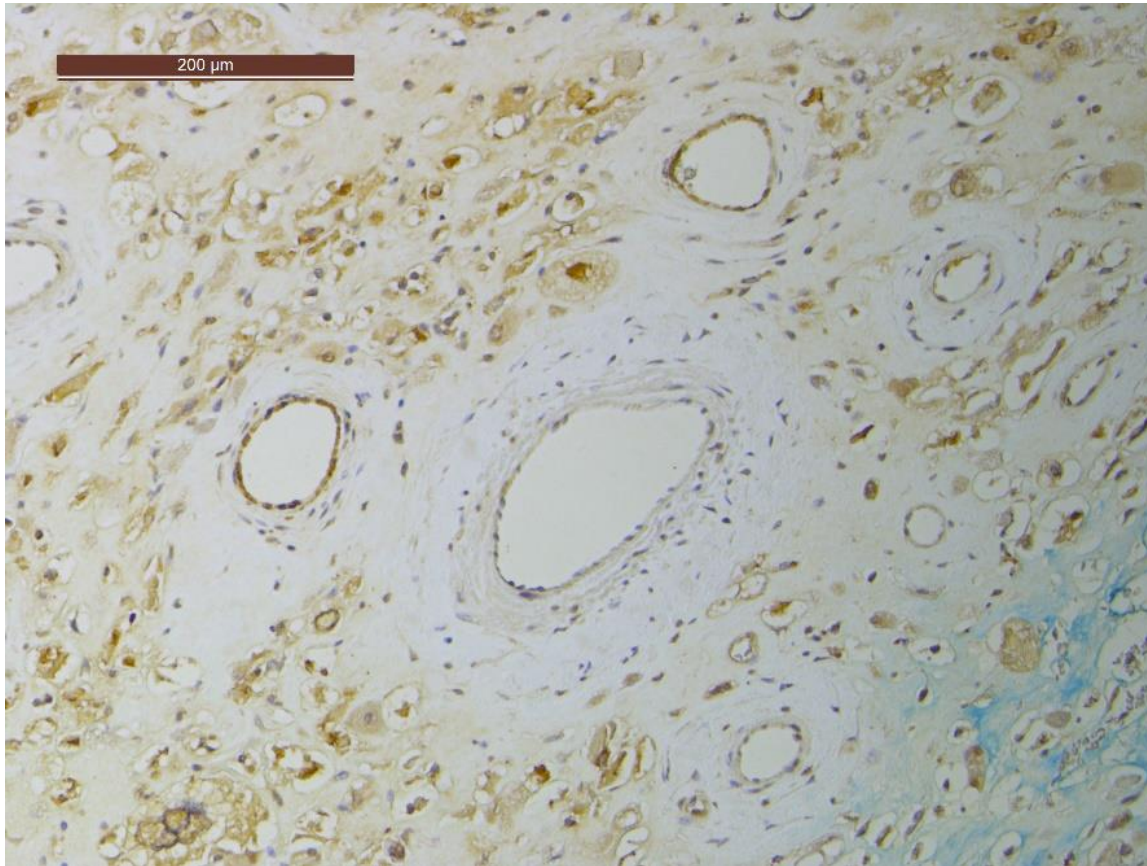

**Patient#12 (ARMS)**

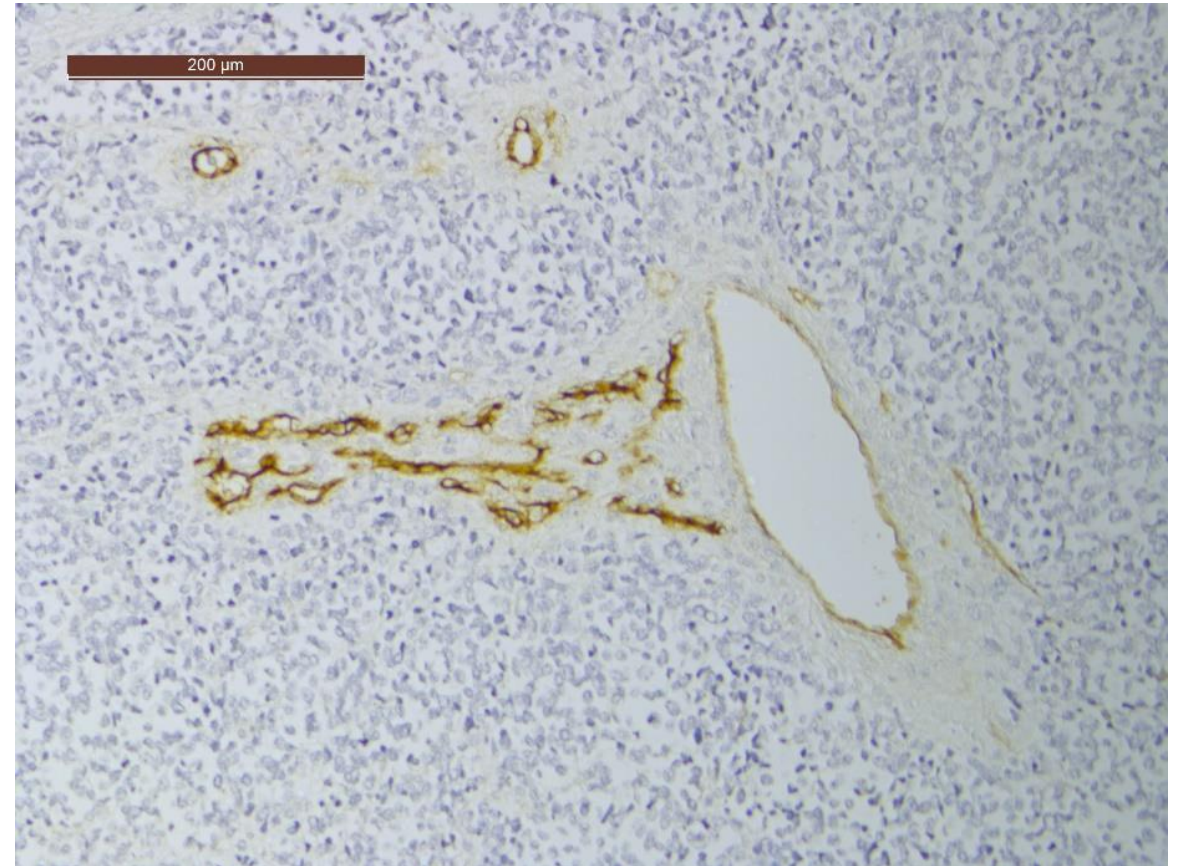

**Supplemental Fig. 1: Immunostaining of CD105 for ERMS and ARMS. Magnification x 200.**

The Pictures show that CD105 is specifically associated with new small developing vessels compared to large vessels in rhabdomyosarcoma.
